# Supplementary material for: Rheological behavior of silver nanowire conductive inks during screen printing
Source: Springer Nature journal article supplement (doi:10.1007/s11051-016-3561-4), 2016-08-01
Supplement: MOESM1 [file 10601736]

**Rheological Behavior of Silver-Nanowire Conductive Inks During Screen Printing**

**Supplementary Information**

Shohreh Hemmati, Dale P. Barkey, and Nivedita Gupta

Department of Chemical Engineering, University of New Hampshire, Durham, NH, 03824.

Some of the results for the rheological behavior of the low content of AgNWs-40 are provided in this supplementary information to illustrate the rheological behavior of AgNWs suspensions in the dilute, and semi dilute regimes.

Figure S1 shows the measured viscosity versus time in the PH test for several contents of AgNWs (AgNWs-40) ink at several temperatures. The results for the PH for tests at several contents of AgNWs-40 are summarized in Table S1. The viscosity of the ink as a function of time in different steps of the printing process at very low content (0.04, and 0.25 wt.%) is somewhat noisy. The viscosity increases by an order of magnitude on the transition to the concentrated regime (3 wt.%) as a result of wire-wire and fluid-wire interactions at higher wire contents.

|  |
| --- |
|  |
|  |
|  |
|  |
|  |
|  |
|  |

Figure S: Measured viscosity versus time in the PH test for several contents of AgNWs (AgNWs-40) ink at several temperatures.

Table S: Average viscosity at different steps of the peak hold test as a function of silver nanowire (AgNWs-40) content and temperature.

| **Sample** | **Temperature (K)** | **Viscosity (Pa**⋅**s)** | | |
| --- | --- | --- | --- | --- |
| Average at Low Shear | Average at High Shear | Final Recovered |
| 0.04 wt.% AgNW-40 | 288 | 0.50 | 0.20 | 0.56 |
| 298 | 0.29 | 0.13 | 0.32 |
| 308 | 0.17 | 0.08 | 0.25 |
| 318 | 0.07 | 0.05 | 0.21 |
| 0.25 wt.% AgNW-40 | 288 | 0.91 | 0.22 | 0.82 |
| 298 | 0.48 | 0.15 | 0.47 |
| 308 | 0.38 | 0.10 | 0.42 |
| 318 | 0.25 | 0.06 | 0.18 |
| 0.5 wt.% AgNW-40 | 288 | 1.78 | 0.28 | 1.94 |
| 298 | 0.91 | 0.16 | 0.95 |
| 308 | 0.81 | 0.11 | 0.80 |
| 318 | 0.76 | 0.08 | 0.64 |
| 0.75 wt.% AgNW-40 | 288 | 1.75 | 0.24 | 1.71 |
| 298 | 0.91 | 0.15 | 1.24 |
| 308 | 1.21 | 0.11 | 1.33 |
| 318 | 1.49 | 0.07 | 1.41 |
| 1 wt.% AgNW-40 | 288 | 3.00 | 0.28 | 2.95 |
| 298 | 2.82 | 0.21 | 3.17 |
| 308 | 2.18 | 0.13 | 2.59 |
| 318 | 2.11 | 0.08 | 2.27 |
| 1.25 wt.% AgNW-40 | 288 | 2.62 | 0.26 | 2.54 |
| 298 | 1.70 | 0.18 | 2.15 |
| 308 | 1.52 | 0.09 | 1.70 |
| 318 | 1.97 | 0.08 | 1.84 |
| 1.5 wt.% AgNW-40 | 288 | 3.67 | 0.25 | 3.34 |
| 298 | 2.58 | 0.19 | 2.85 |
| 308 | 2.91 | 0.13 | 2.96 |
| 318 | 2.96 | 0.09 | 2.75 |
| 3 wt.% AgNW-40 | 288 | 24.0 | 0.50 | 24.5 |
| 298 | 18.8 | 0.32 | 18.5 |
| 308 | 16.9 | 0.25 | 18.0 |
| 318 | 18.4 | 0.23 | 18.4 |

The number density of particles and the value of for selected silver nanowire contents are shown in Table S2.

Table S: Dilute/ semi dilute/ concentrated regime transition criteria for several contents of AgNWs-40 (d=40nm, L=30μm).

| **Sample** | **1/dL2** | **4.2/dL2** | **β**  **(Dimensionless Constant)** | **υ (Number Density)**  **# AgNWs/m3** |
| --- | --- | --- | --- | --- |
|
| 0.04 wt.% AgNW-40 | 2.78E+16 | 1.17E+17 | 2.74E+01 | 1.01E+15 |
| 0.25 wt.% AgNW-40 | 1.75E+02 | 6.47E+15 |
| 0.5 wt.% AgNW-40 | 3.57E+02 | 1.32E+16 |
| 0.75 wt.% AgNW-40 | 5.48E+02 | 2.03E+16 |
| 1 wt.% AgNW-40 | 7.47E+02 | 2.77E+16 |
| 1.25 wt.% AgNW-40 | 9.54E+02 | 3.53E+16 |
| 1.5 wt.% AgNW-40 | 1.17E+03 | 4.33E+16 |
| 3 wt.% AgNW-40 | 2.63E+03 | 9.74E+16 |

The results for the correlation by fitting a time constant from the SEmo for low content of AgNWs-40 inks are shown in Figure S2. These results illustrate that the SEmo model is an appropriate model for the viscosity recovery at low wire contents.

|  |
| --- |
|  |
|  |
|  |
|  |
|  |
|  |
|  |

Figure S: Correlation of the build-up structure for several contents of AgNWs-40 at several temperatures.
